# Supplementary material
Source: PubMed Central journal article supplement (PMC9588278)

■ WT mice ■  $CD^{+/-}$  mice

9.8 kHz Background

Time Course of Trial Initiation Learning

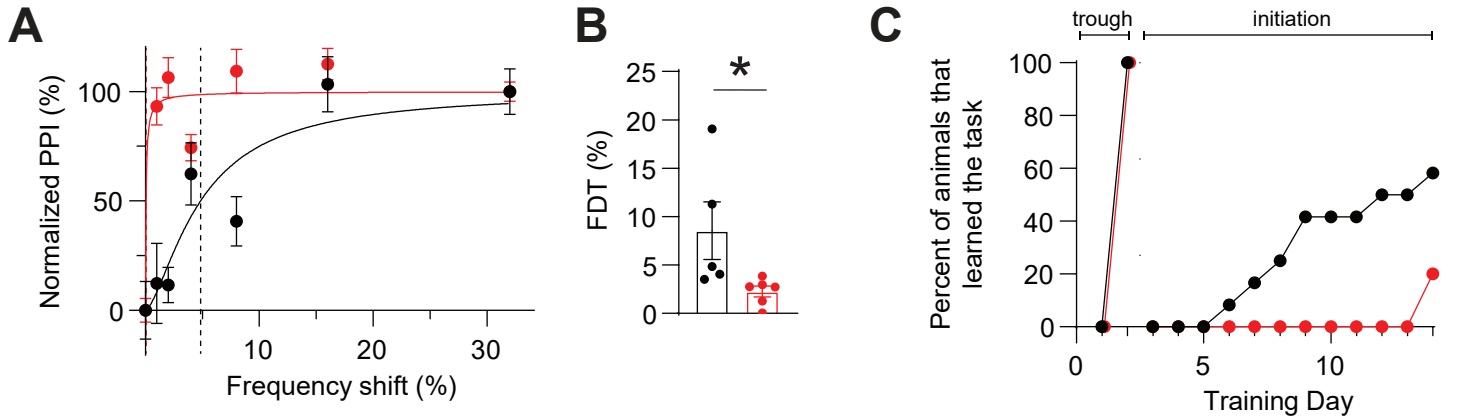

**D** Acoustic Startle Response

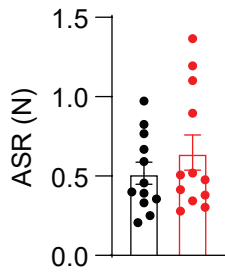

**E** Auditory Brainstem Response

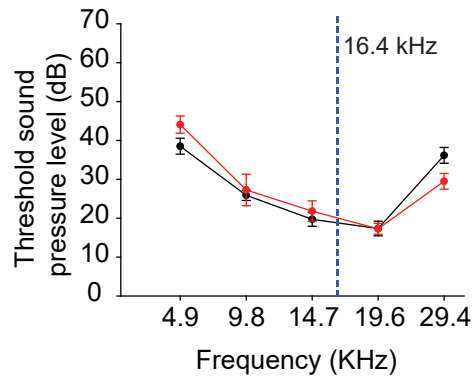

**F** Thalamic excitatory (relay) neurons

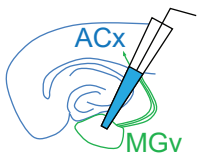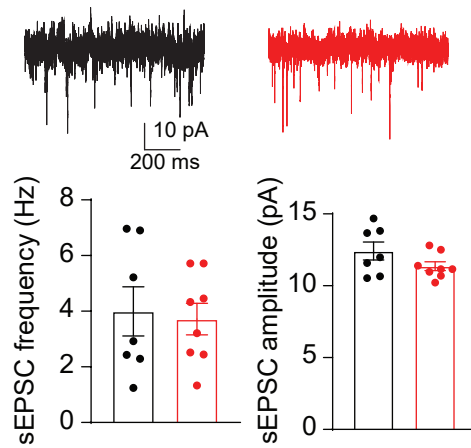

**G** L4 excitatory neurons

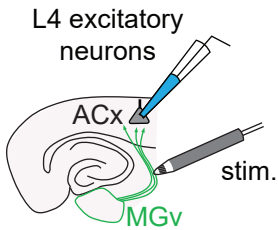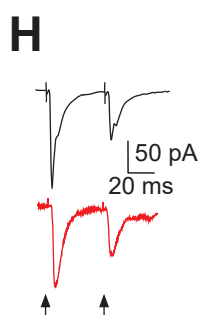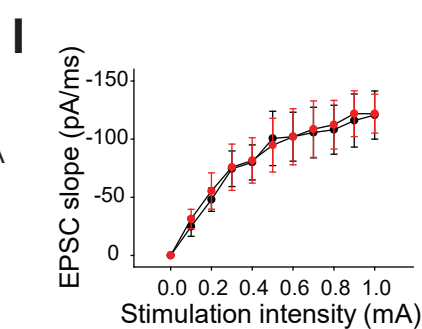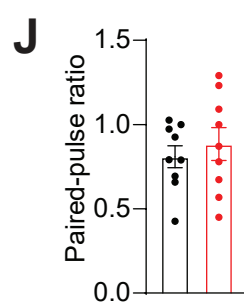

Supplement: NIHMS1833282-supplement-1.pdf [file NIHMS1833282-supplement-1.pdf]
