# Supplementary material
Source: PubMed Central journal article supplement (PMC9588278)

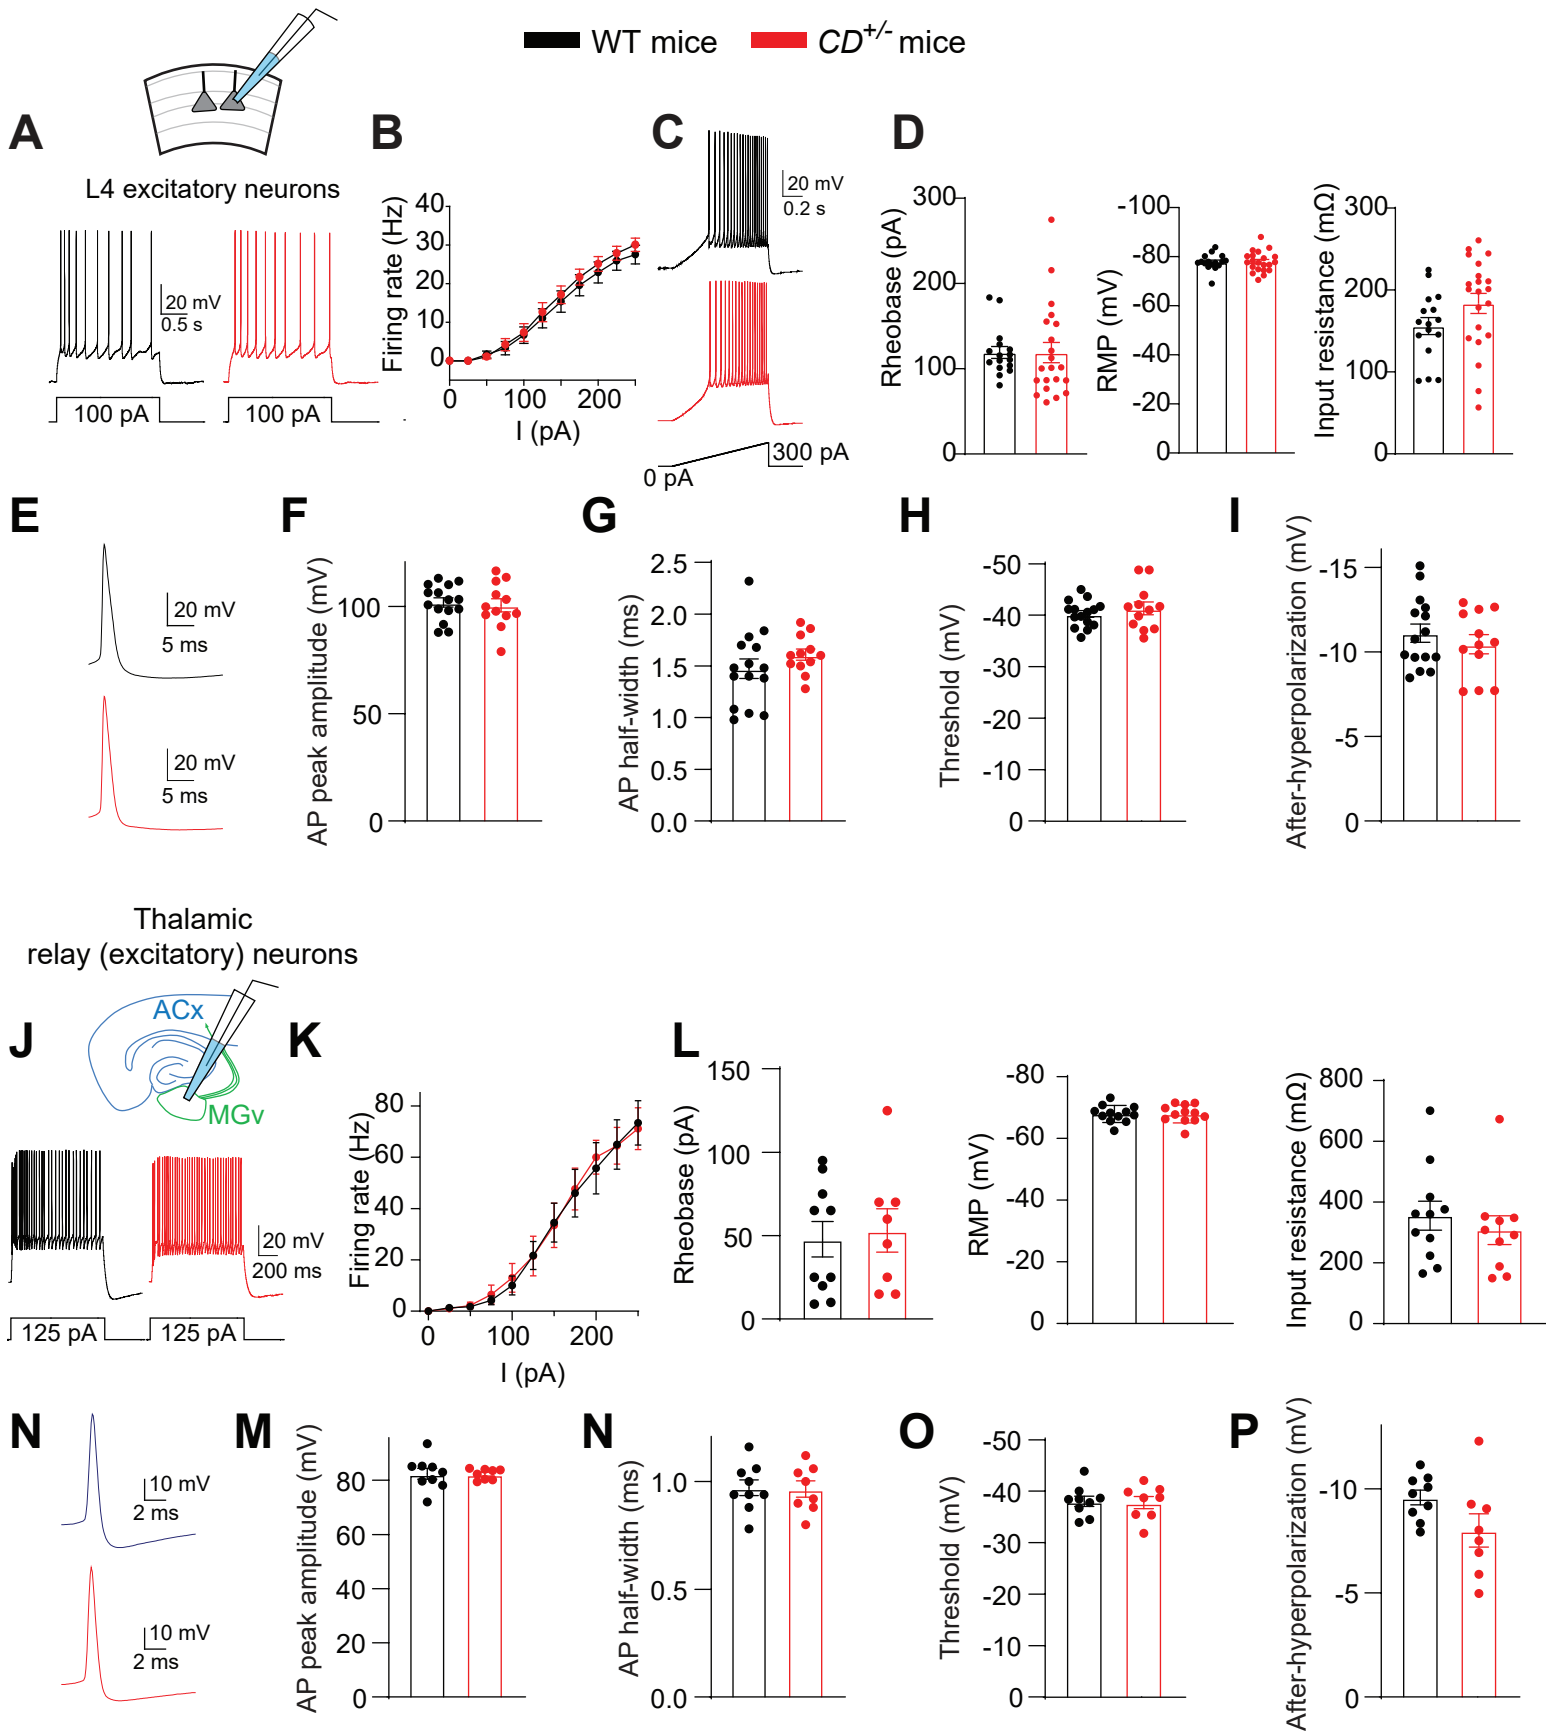

Supplement: NIHMS1833282-supplement-2.pdf [file NIHMS1833282-supplement-2.pdf]

■ WT mice ■  $CD^{+/-}$  mice

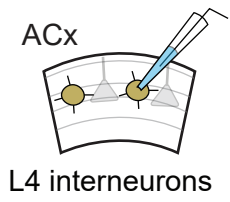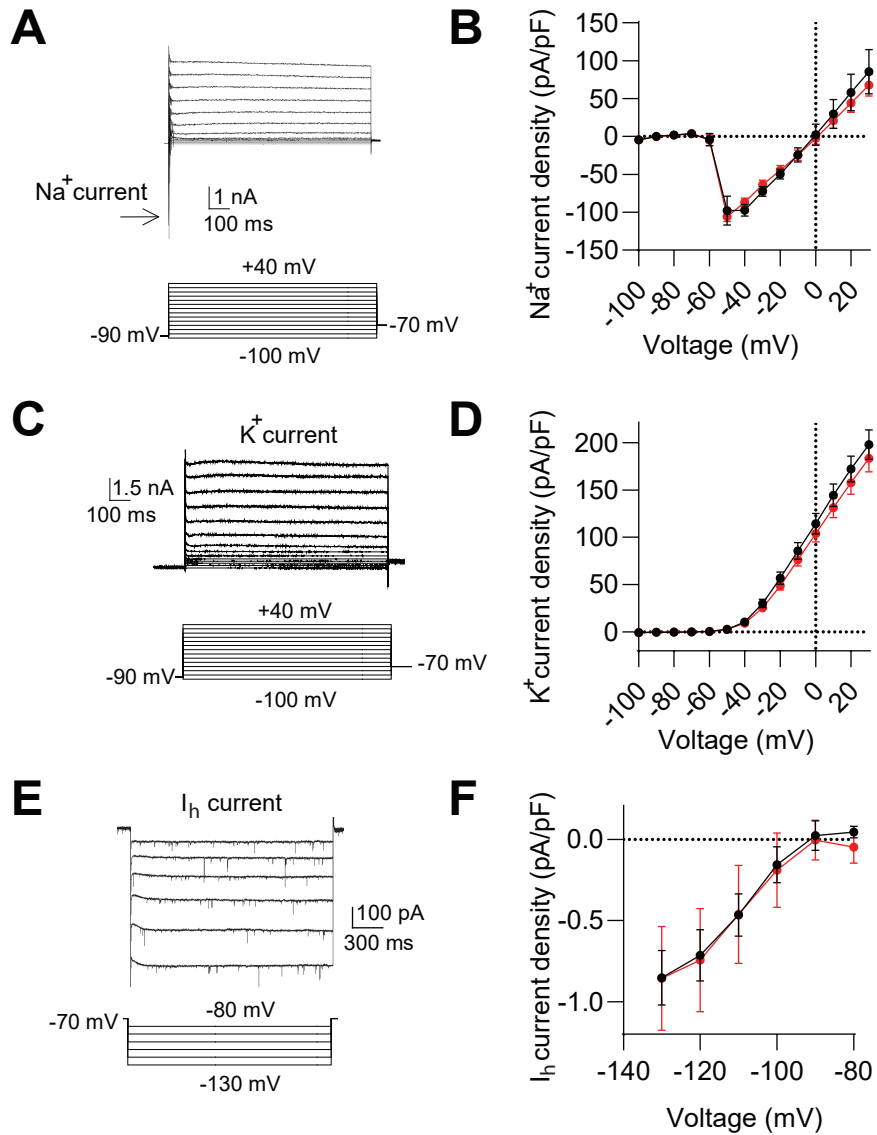

Supplement: NIHMS1833282-supplement-3.pdf [file NIHMS1833282-supplement-3.pdf]

■ WT mice ■  $CD^{+/-}$  mice

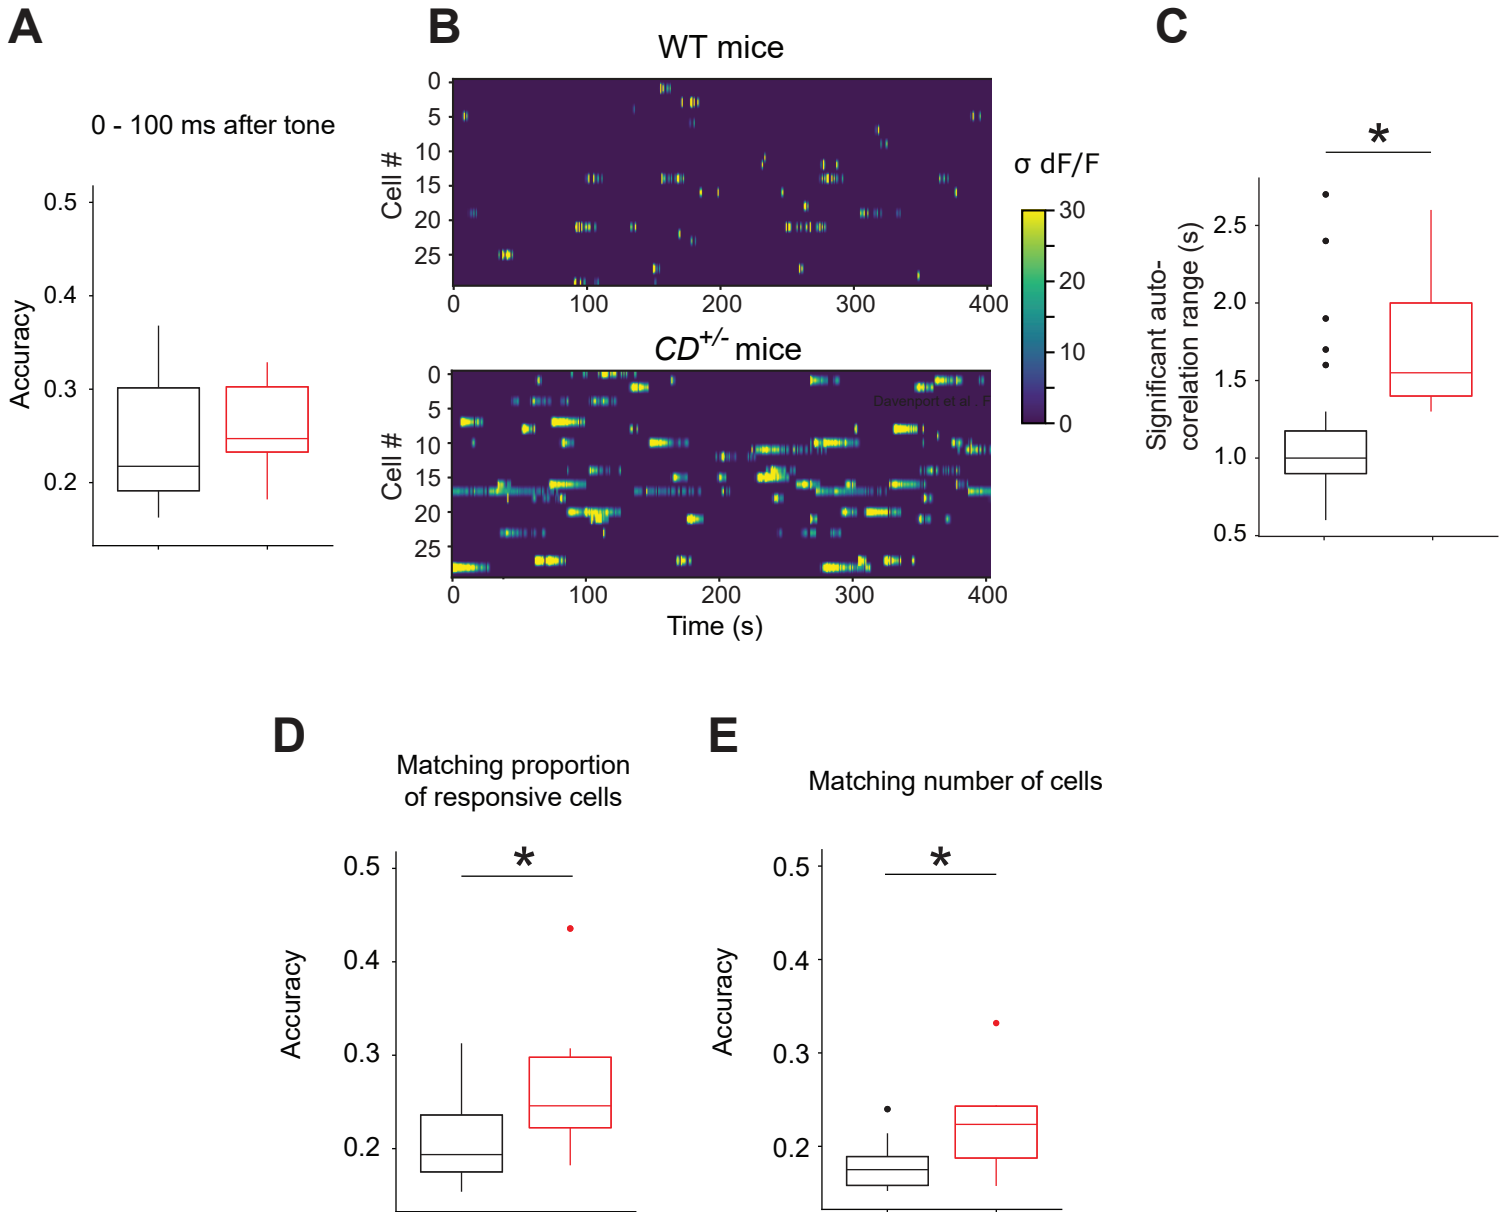

Supplement: NIHMS1833282-supplement-4.pdf [file NIHMS1833282-supplement-4.pdf]

### A Time Course of Trial Initiation Learning

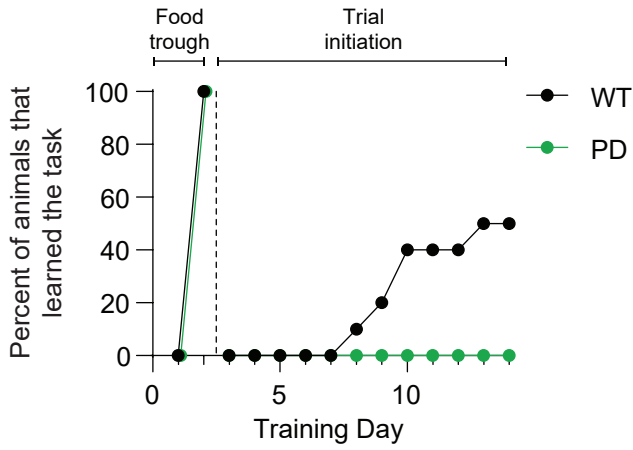

### B

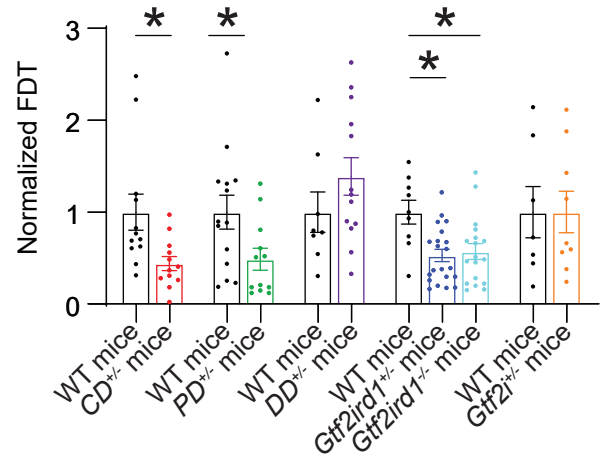

### C

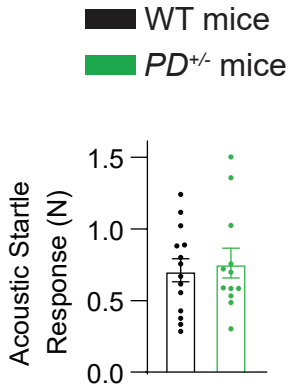

### D

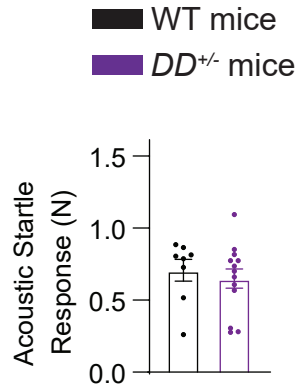

### E

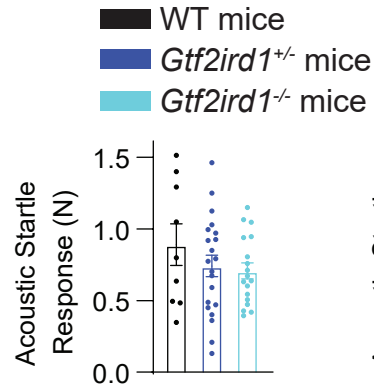

### F

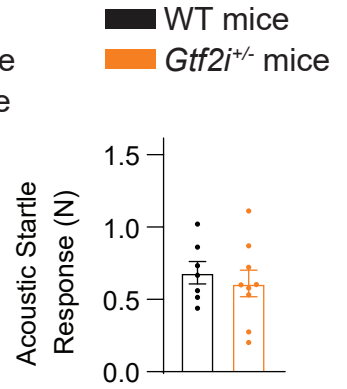

Supplement: NIHMS1833282-supplement-5.pdf [file NIHMS1833282-supplement-5.pdf]

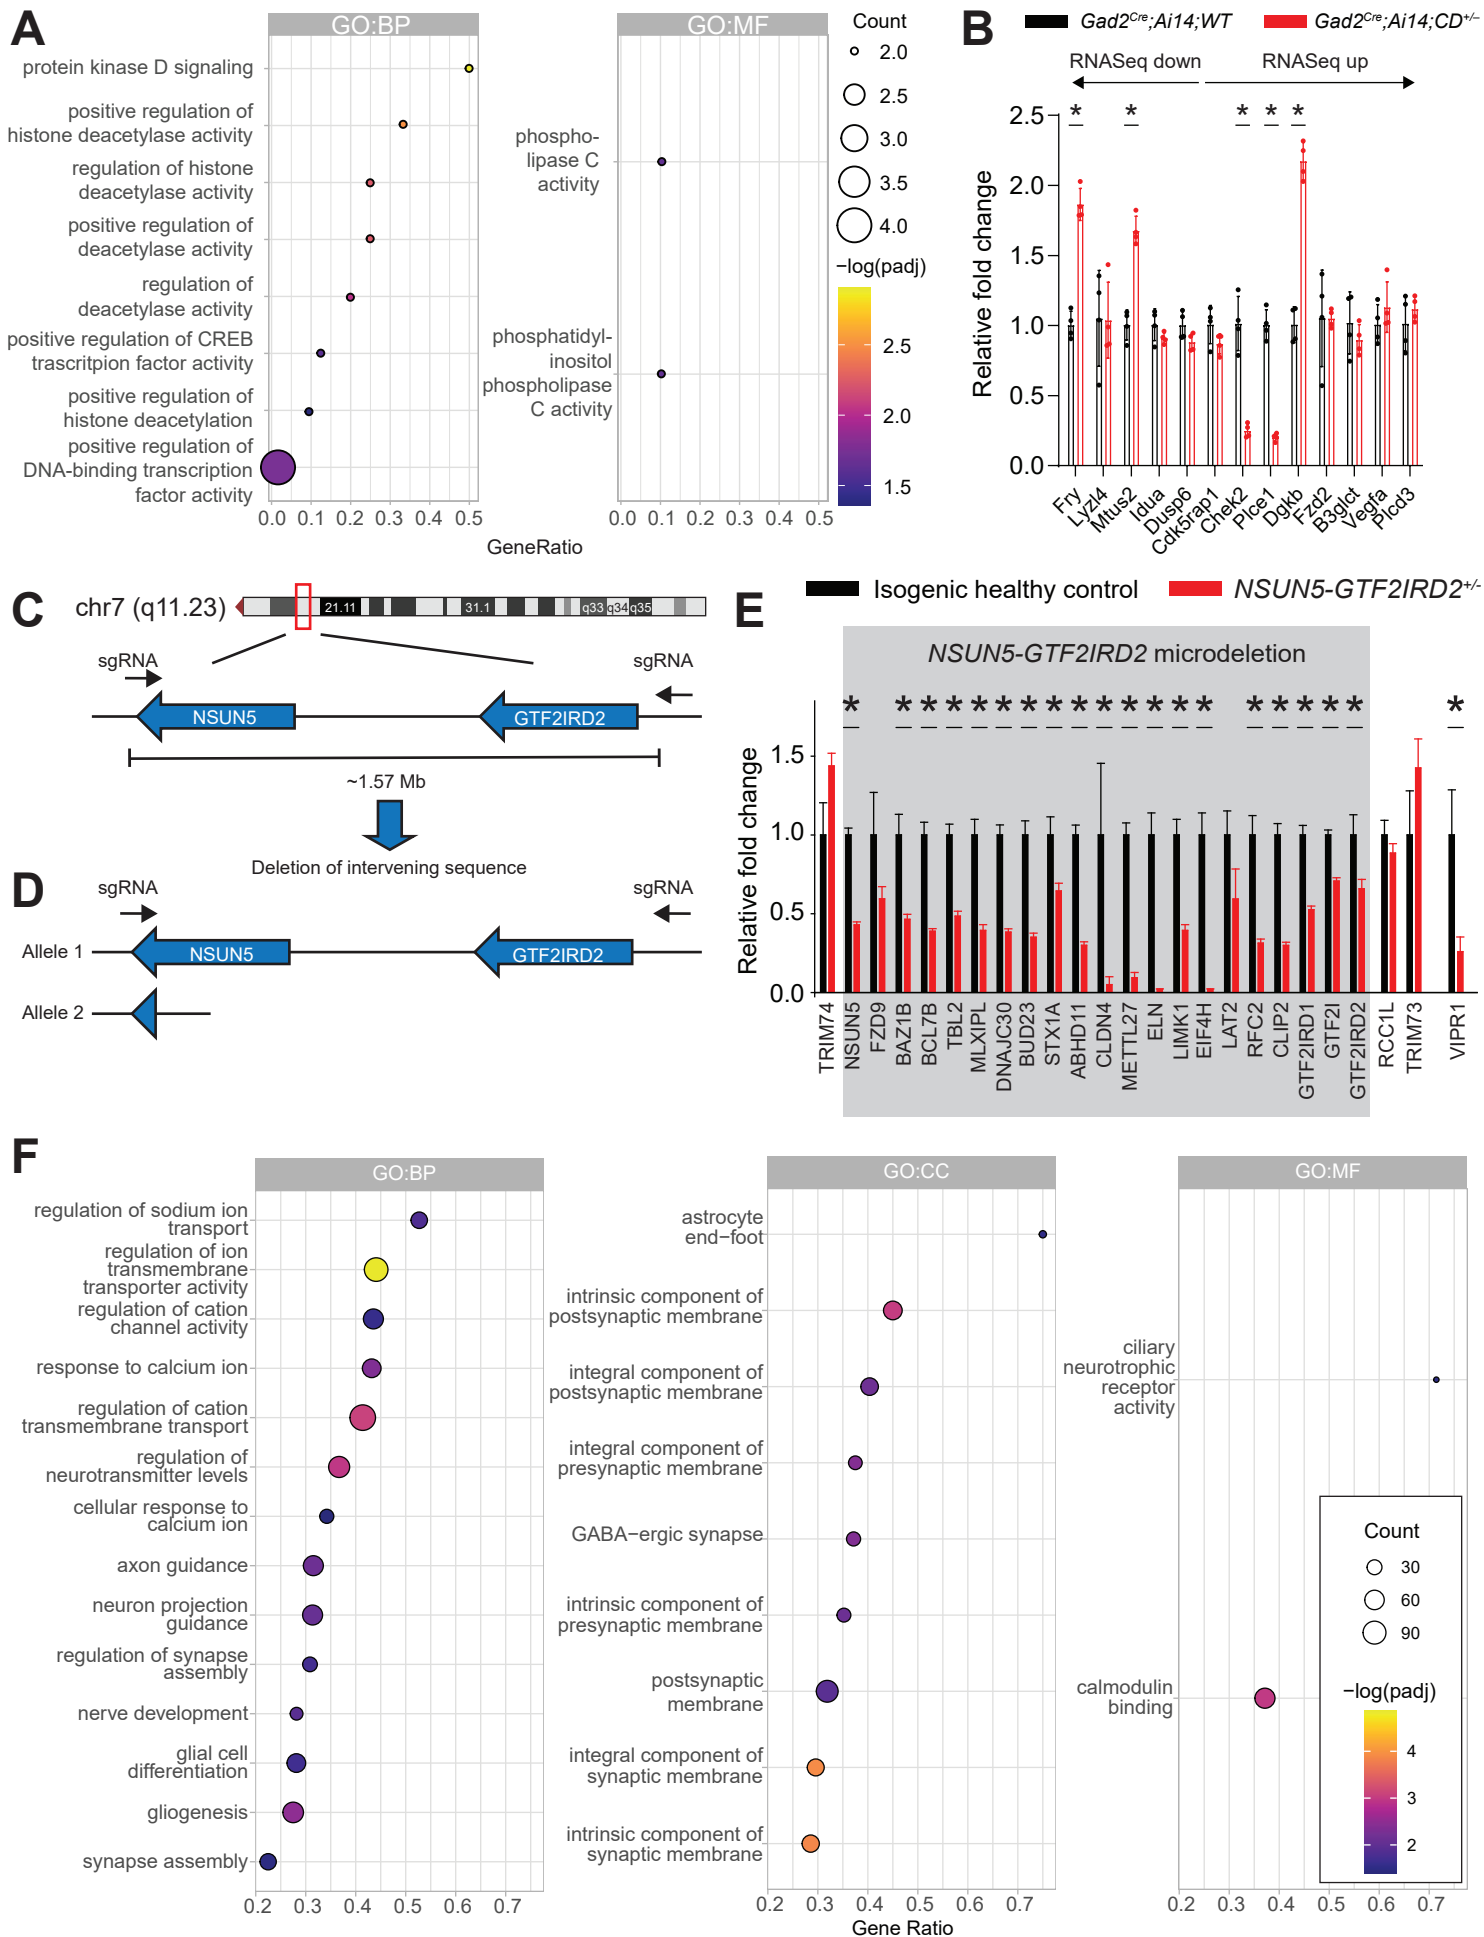

Supplement: NIHMS1833282-supplement-6.pdf [file NIHMS1833282-supplement-6.pdf]

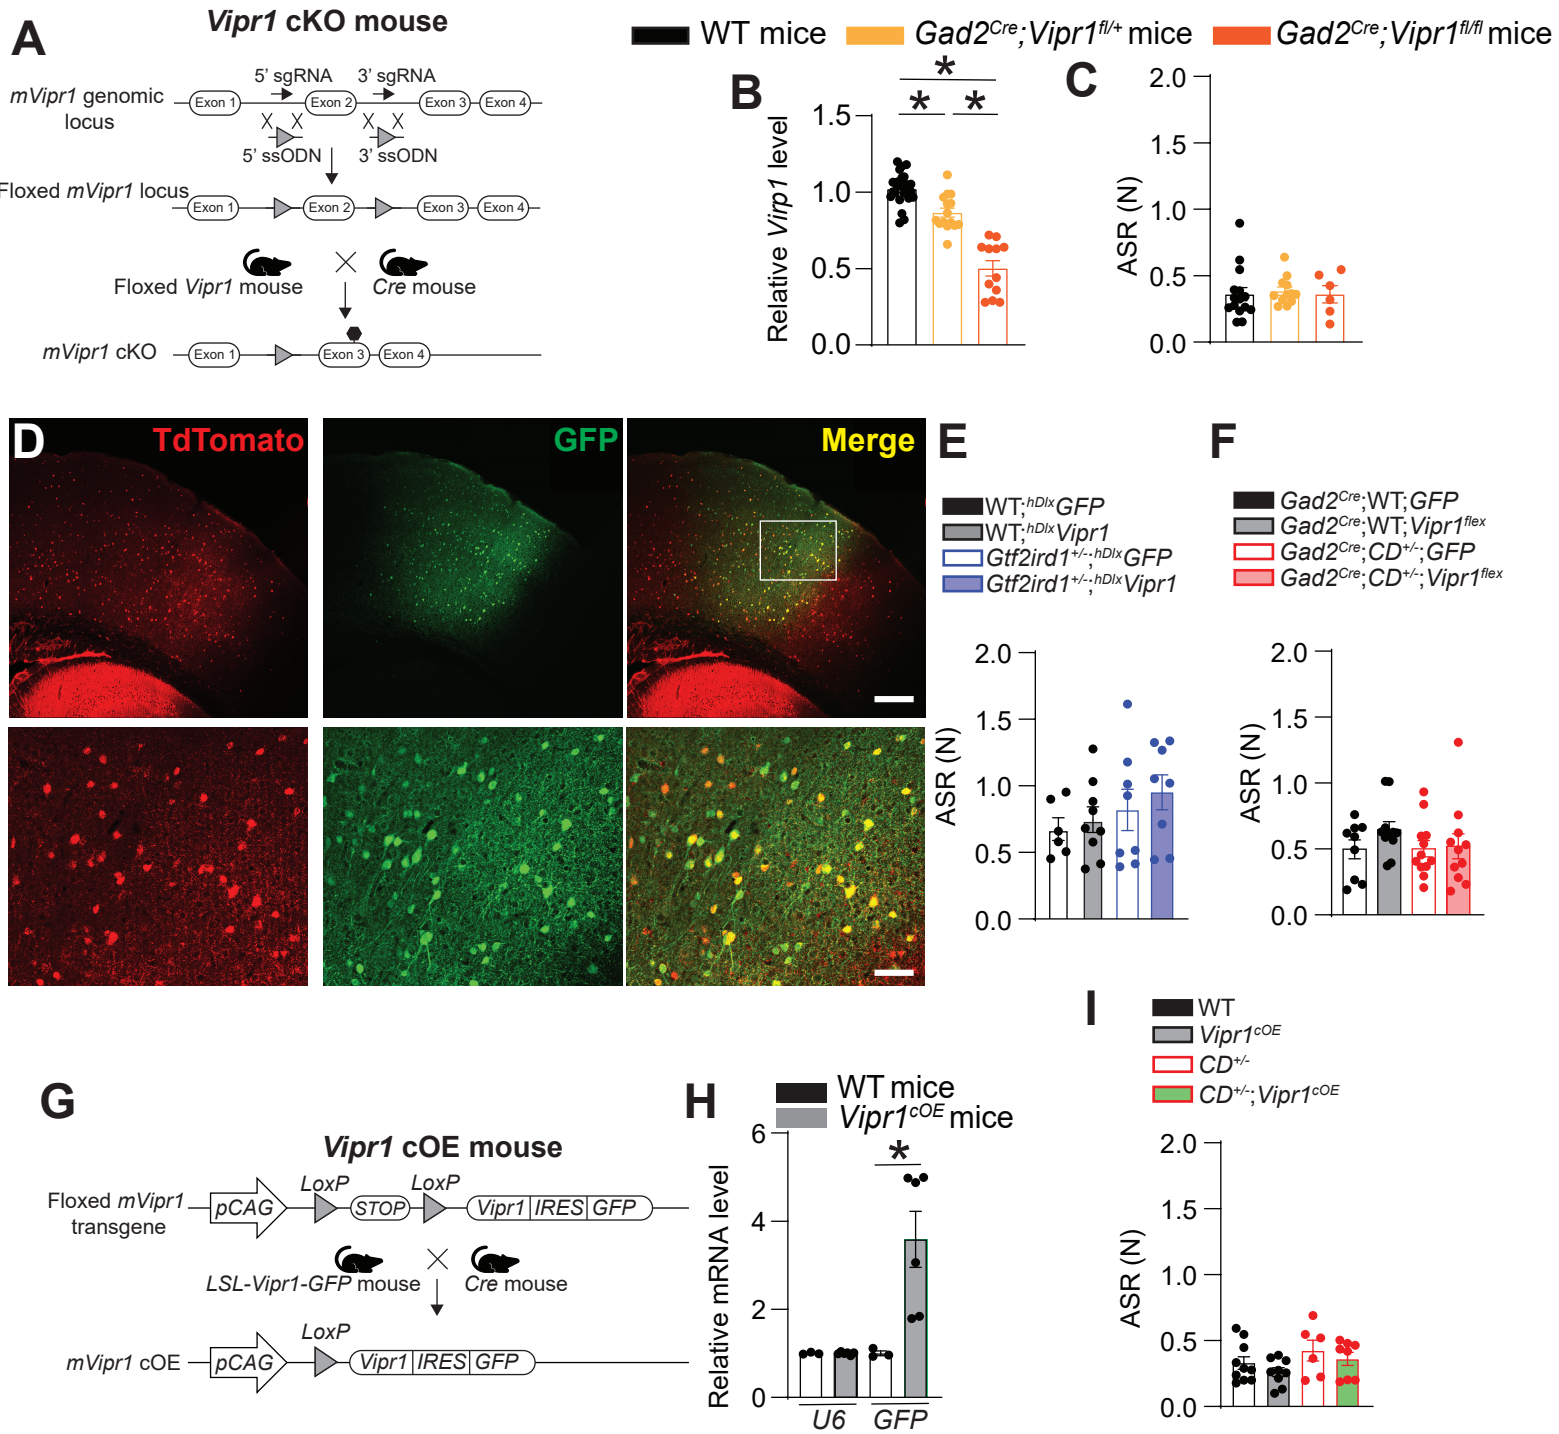

Davenport et al. Figure S7.

Supplement: NIHMS1833282-supplement-7.pdf [file NIHMS1833282-supplement-7.pdf]
